# Supplementary material for: c-Abl-mediated Drp1 phosphorylation promotes oxidative stress-induced mitochondrial fragmentation and neuronal cell death
Source: PubMed Central journal article supplement (PMC5682686; doi:10.1038/cddis.2017.524), 2017-10-12

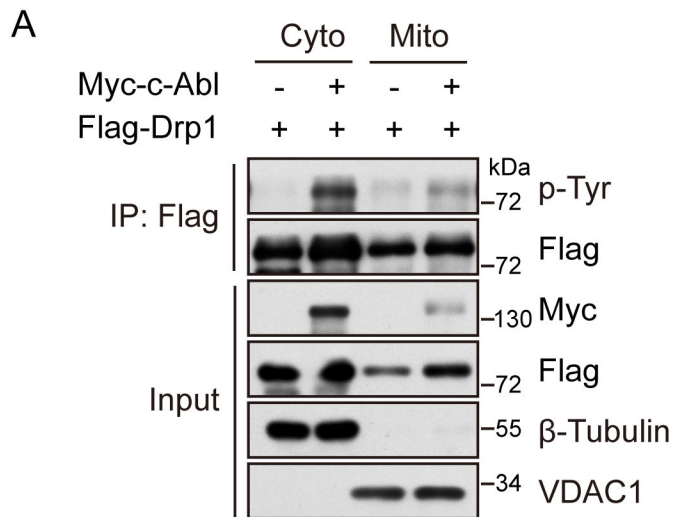

Supplement: cddis2017524x2.pdf [file cddis2017524x2.pdf]
